# Supplementary material for: Microenvironment rigidity modulates responses to the HER2 receptor tyrosine kinase inhibitor lapatinib via YAP and TAZ transcription factors
Source: PubMed Central journal article supplement — Mol Biol Cell. 2015 Nov 5;26(22):3946–53. doi: 10.1091/mbc.E15-07-0456 (PMC4710228; doi:10.1091/mbc.e15-07-0456), 2015-11-05
Supplement: supp_E15-07-0456v1_E15-07-0456_SupplementalMaterial.pdf [file supp_E15-07-0456v1_E15-07-0456_SupplementalMaterial.pdf]

# Supplemental Materials

*Molecular Biology of the Cell*

Lin et al.

**Additional file 1: Figure S1. Knockdown efficiency in siRNA experiments.(A)**

Expression levels of YAP and TAZ measured by qRT-PCR in HCC1569 with NSC siRNA, YAP or TAZ knockdown by siRNA for 72 h. (B) Fold change of expression levels of various receptors and ligands of the HER family were measured by qRT-PCR in HCC1569 with NSC siRNA or AREG knockdown by siRNA after 72 h.

**Additional file 2: Figure S2. Verteporfin has a synergistic effect with**

**lapatinib.** Line graphs show the relative incorporation of EdU, expressed as a percentage of DMSO-treated cells in HCC1569 cultured on 400 Pa or 40 kPa PA gels for 48 h, and then treated with lapatinib (1.5  $\mu$ M) together with verteporfin (0, 0.2, 2, 10  $\mu$ g/mL), or DMSO for 48 h. (n = 3, 500 cells/condition/experiment, \* p < 0.05).

**Additional file 3: Figure S3. Correlation between YAP gene expression with expression of a number of Hippo and HER-related genes in the TCGA**

**dataset.** Summary table shows correlation between *YAP* and *ERBB2* gene expression with the other indicated genes. Pearson's r statistic is shown. Below, regression plots show examples of the fit for all tumor types.

**Additional file 4: Figure S4. Responses to changes in microenvironmental stiffness for 49 different receptor tyrosine kinases (RTK).** (A) Images of RTK array membranes that were probed with extracts from HCC1569 cells. HCC1569 were grown for 48 h on 400 Pa or 40 kPa PA gel for 48 h, treated with lapatinib (1.5  $\mu$ M) or DMSO, and then harvested at 1 h or 48 h after lapatinib treatment. (B) Bar graphs showing quantification of intensity of phosphorylation on EGFR, HER2, HER3, VEGFR1, and RYK RTKs. (C) A complete table of the RTKs represented on the blot.#

**A**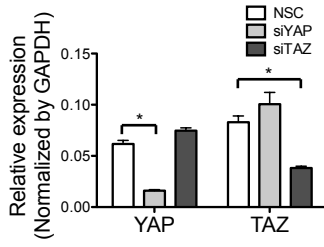**B**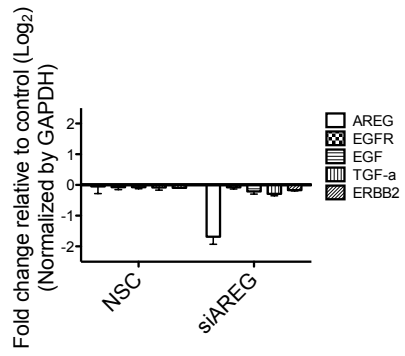

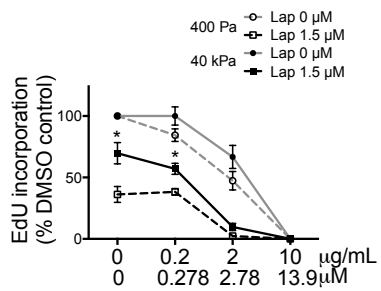

|              |             | <b>AREG</b> | <b>TAZ</b> | <b>ERBB2</b> | <b>EGFR</b> | <b>ERBB3</b> | <b>CTGF</b> |
|--------------|-------------|-------------|------------|--------------|-------------|--------------|-------------|
| <b>YAP</b>   | Pearson r   | 0.0825      | -0.05424   | -0.05704     | 0.3713      | -0.2447      | 0.3115      |
|              | P value     | 0.0452      | 0.1883     | 0.1664       | < 0.0001    | < 0.0001     | < 0.0001    |
|              | Significant | *           | ns         | ns           | ***         | ***          | ***         |
|              |             | <b>AREG</b> | <b>TAZ</b> | <b>YAP</b>   | <b>EGFR</b> | <b>ERBB3</b> | <b>CTGF</b> |
| <b>ERBB2</b> | Pearson r   | 0.08503     | 0.01709    | -0.05704     | -0.2654     | 0.3689       | -0.02014    |
|              | P value     | 0.039       | 0.6787     | 0.1664       | < 0.0001    | < 0.0001     | 0.6253      |
|              | Significant | *           | ns         | ns           | ***         | ***          | ns          |

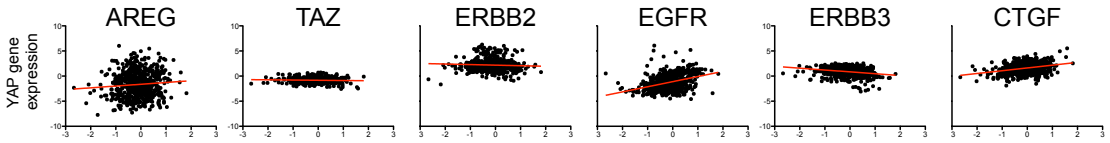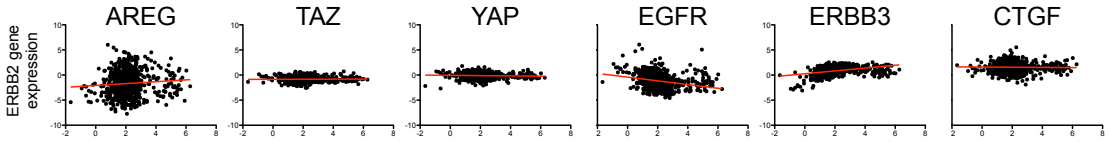

**A**

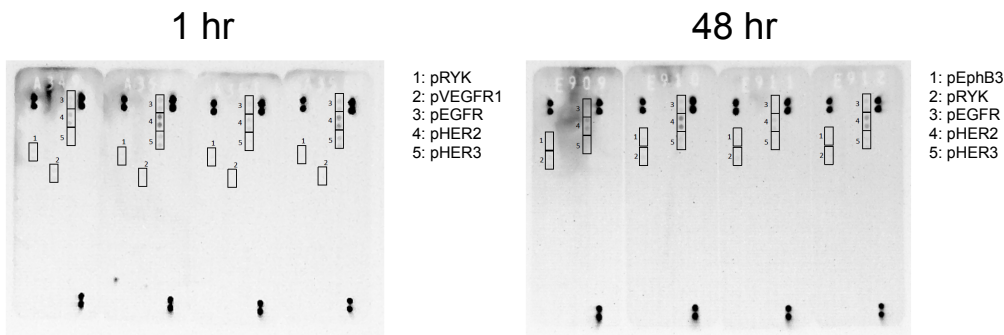

**B**

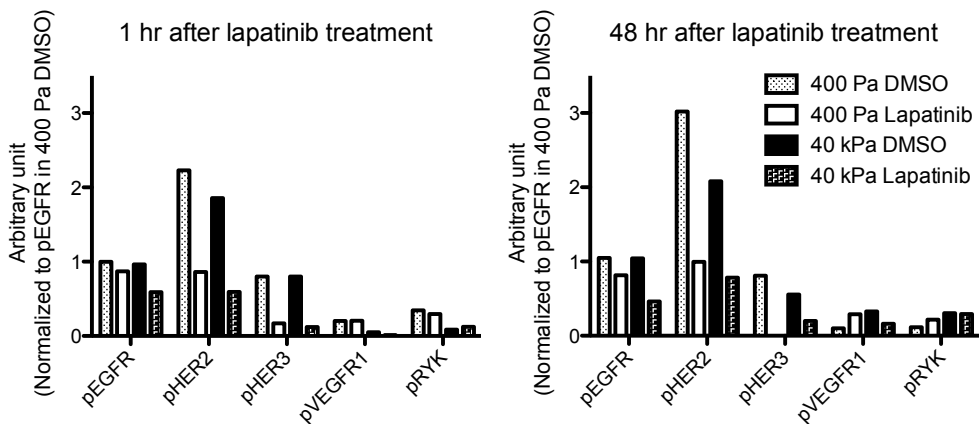

**C**

**Human Phospho-RTK Array Coordinates**

Refer to the table below for the Human Phospho-RTK Array coordinates.

| Coordinate | Receptor Family | RTK/Control     | Coordinate | Receptor Family | RTK/Control |
|------------|-----------------|-----------------|------------|-----------------|-------------|
| A1, A2     | Reference Spots | ---             | D1, D2     | Tie             | Tie-2       |
| A23, A24   | Reference Spots | ---             | D3, D4     | NGF R           | TrkA        |
| B1, B2     | EGF R           | EGF R           | D5, D6     | NGF R           | TrkB        |
| B3, B4     | EGF R           | ErbB2           | D7, D8     | NGF R           | TrkC        |
| B5, B6     | EGF R           | ErbB3           | D9, D10    | VEGF R          | VEGF R1     |
| B7, B8     | EGF R           | ErbB4           | D11, D12   | VEGF R          | VEGF R2     |
| B9, B10    | FGF R           | FGF R1          | D13, D14   | VEGF R          | VEGF R3     |
| B11, B12   | FGF R           | FGF R2a         | D15, D16   | MuSK            | MuSK        |
| B13, B14   | FGF R           | FGF R3          | D17, D18   | Eph R           | EphA1       |
| B15, B16   | FGF R           | FGF R4          | D19, D20   | Eph R           | EphA2       |
| B17, B18   | Insulin R       | Insulin R       | D21, D22   | Eph R           | EphA3       |
| B19, B20   | Insulin R       | IGF-1 R         | D23, D24   | Eph R           | EphA4       |
| B21, B22   | Axl             | Axl             | E1, E2     | Eph R           | EphA6       |
| B23, B24   | Axl             | Dtk             | E3, E4     | Eph R           | EphA7       |
| C1, C2     | Axl             | Mer             | E5, E6     | Eph R           | EphB1       |
| C3, C4     | HGF R           | HGF R           | E7, E8     | Eph R           | EphB2       |
| C5, C6     | HGF R           | MSP R           | E9, E10    | Eph R           | EphB4       |
| C7, C8     | PDGF R          | PDGF R $\alpha$ | E11, E12   | Eph R           | EphB6       |
| C9, C10    | PDGF R          | PDGF R $\beta$  | E13, E14   | Insulin R       | ALK         |
| C11, C12   | PDGF R          | SCF R           | E15, E16   | ---             | DDR1        |
| C13, C14   | PDGF R          | Flt-3           | E17, E18   | ---             | DDR2        |
| C15, C16   | PDGF R          | M-CSF R         | E19, E20   | Eph R           | EphA5       |
| C17, C18   | RET             | c-Ret           | E21, E22   | Eph R           | EphA10      |
| C19, C20   | ROR             | ROR1            | F1, F2     | Reference Spots | ---         |
| C21, C22   | ROR             | ROR2            | F5, F6     | Eph R           | EphB3       |
| C23, C24   | Tie             | Tie-1           | F7, F8     | ---             | RYK         |
|            |                 |                 | F23, F24   | Control (-)     | PBS         |
